# Supplementary material for: Reaction of CO2with propylene oxide and styrene oxide catalyzed by a chromium(iii) amine-bis(phenolate) complex
Source: Royal Society of Chemistry journal article supplement (doi:10.1039/c2dt31942j), 2012-11-12
Supplement: c2dt31942j.pdf [file c2dt31942j.pdf]

## Electronic Supplementary Information

### Reaction of CO<sub>2</sub> with Propylene Oxide and Styrene Oxide catalyzed by a Chromium(III) Amine-bis(phenolate) Complex

Rebecca K. Dean,<sup>a</sup> Katalin Devaine-Pressing,<sup>a</sup> Louise N. Dawe,<sup>b</sup> and Christopher M. Kozak<sup>\*a</sup>

<sup>a</sup>Department of Chemistry, Memorial University of Newfoundland, St. John's, Newfoundland, Canada A1B 3X7. E-mail: [ckozak@mun.ca](mailto:ckozak@mun.ca); Tel: +1-709-864-8082

<sup>b</sup>C-CART X-ray Diffraction Laboratory, Department of Chemistry, Memorial University of Newfoundland, St. John's, Newfoundland, Canada

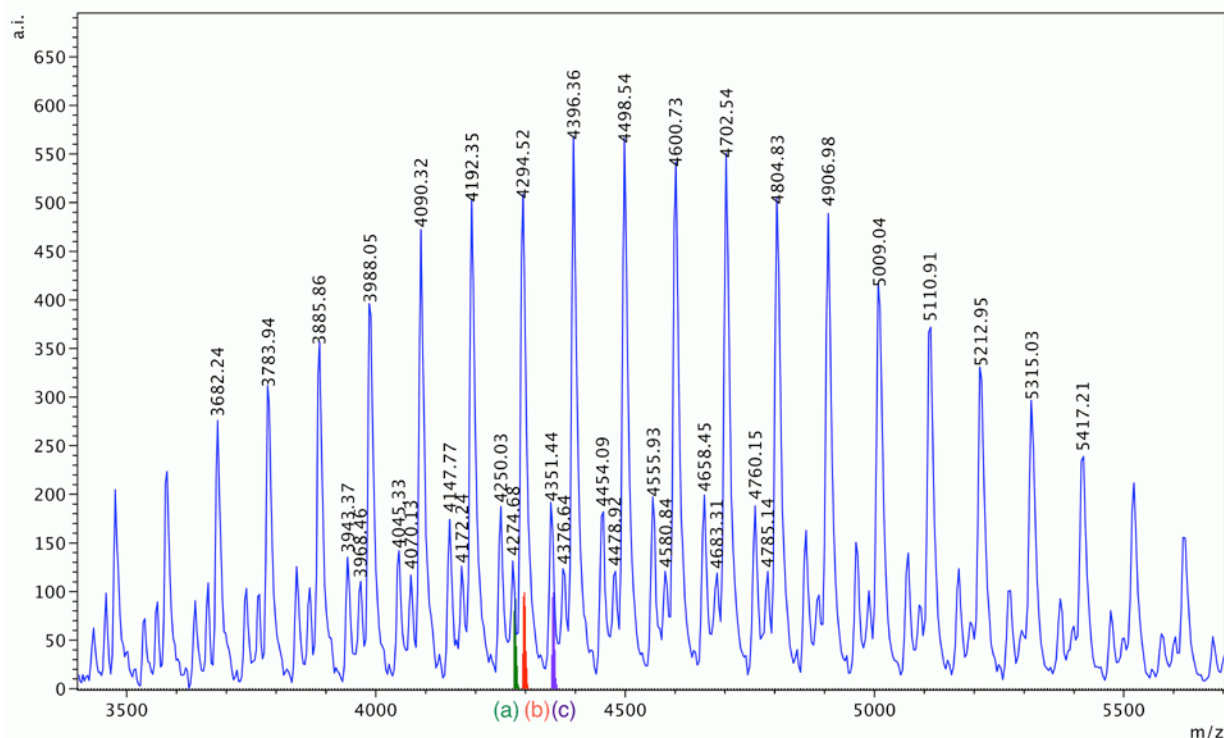

**Figure S1.** MALDI-TOF MS of PPC produced by **1a** with PPNN<sub>3</sub> (Table 1, entry 5). Modeled isotopic masses (when n = 41) for polymer chains with end groups (a-c) as shown in Figure 7.

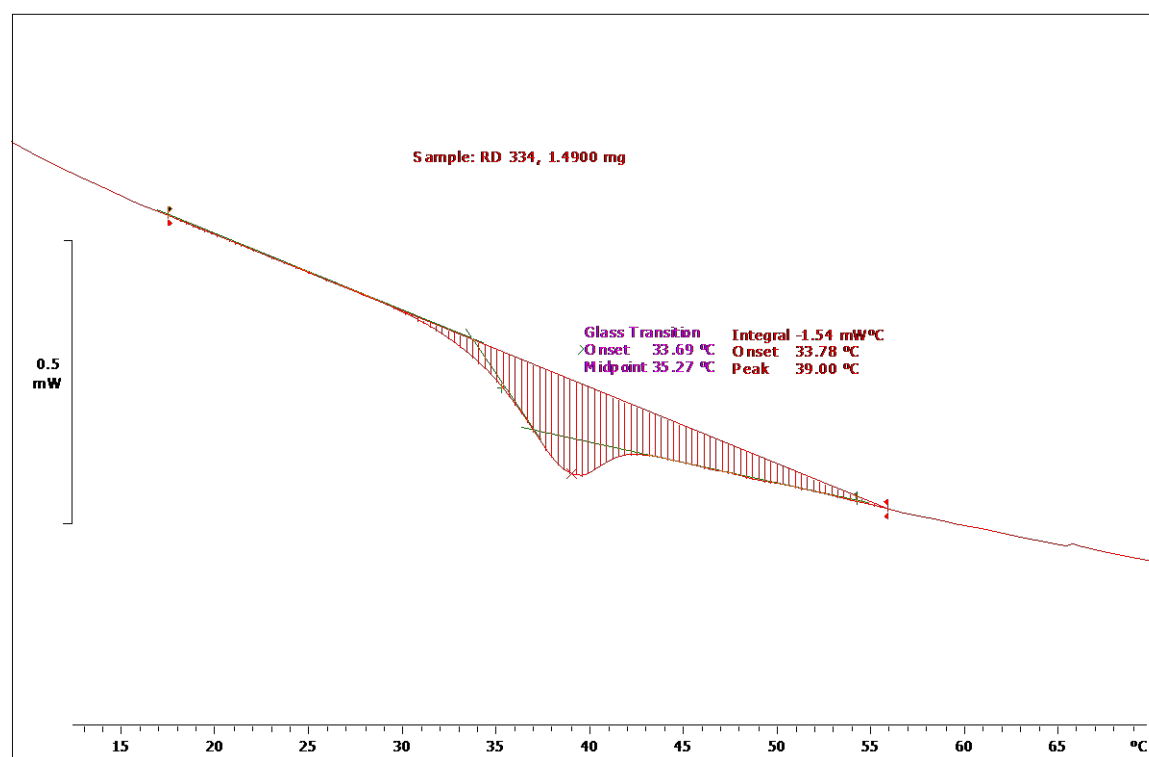

**Figure S2.** Representative DSC trace of PPC produced by **1**, 2nd heat cycle (Table 1, entry 7).

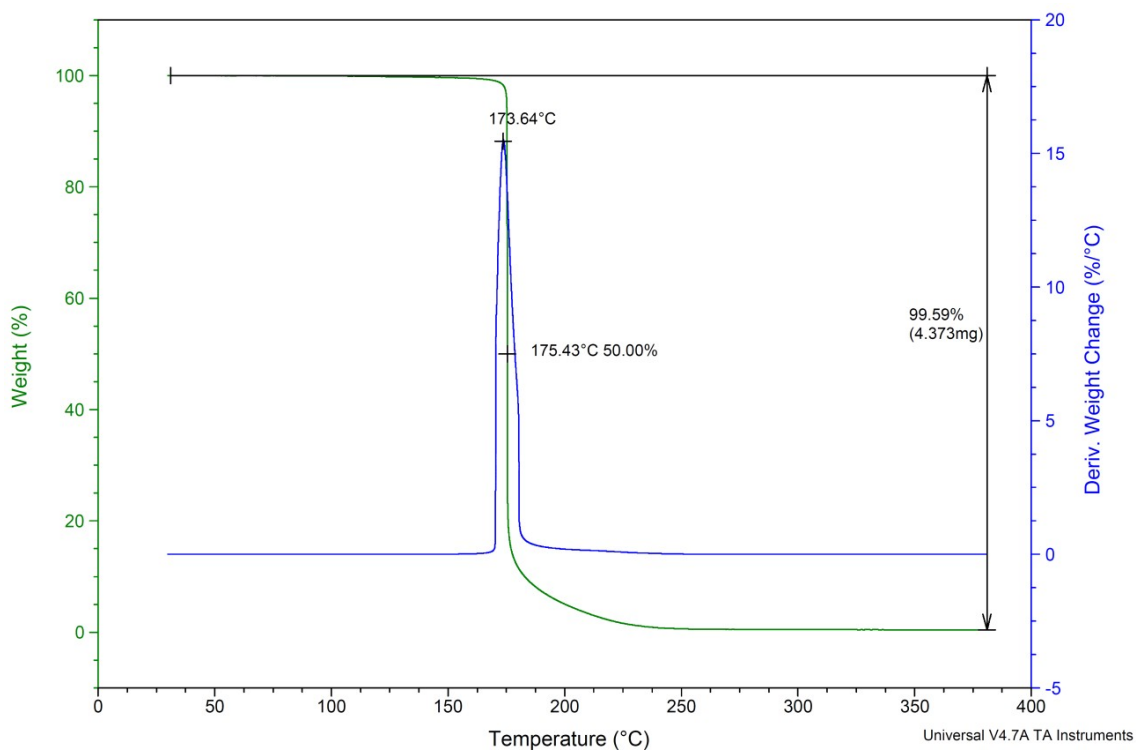

**Figure S3.** Representative TGA trace and derivative plot of PPC produced by **1** (Table 1, entry 7).

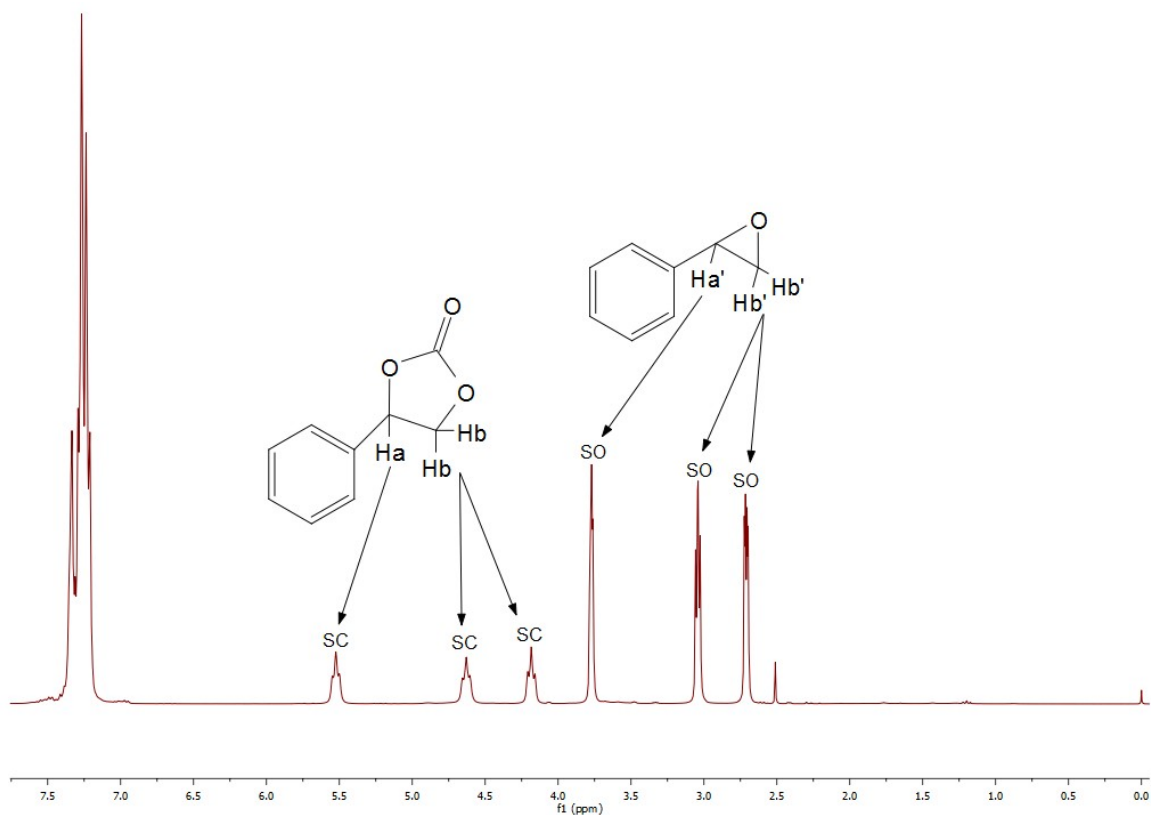

**Figure S4.**  $^1\text{H}$  NMR spectrum of an aliquot from the reaction mixture of  $\text{SO}/\text{CO}_2$  in  $\text{CDCl}_3$  (Table 2, entry 3).
